# Supplementary material for: Whole Genome Amplification of Day 3 or Day 5 Human Embryos Biopsies Provides a Suitable DNA Template for PCR-Based Techniques for Genotyping, a Complement of Preimplantation Genetic Testing
Source: Hindawi journal article supplement (doi:10.1155/2017/1209158), 2017-01-01
Supplement: f1 [file 1209158.f1.pdf]

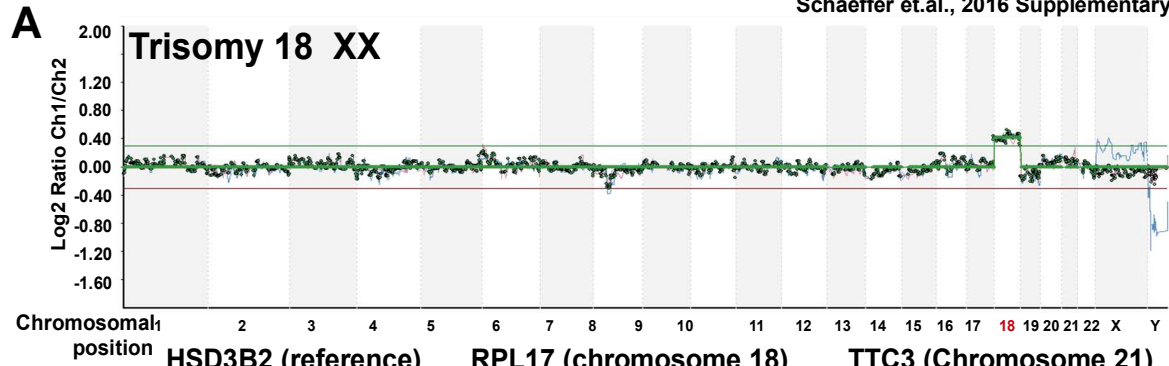

**HSD3B2 (reference)**

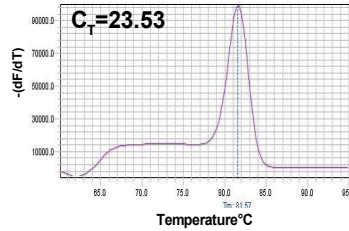

**RPL17 (chromosome 18)**

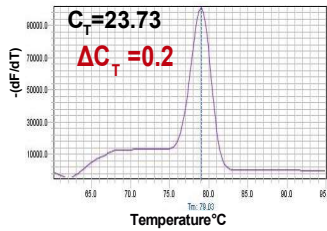

**TTC3 (Chromosome 21)**

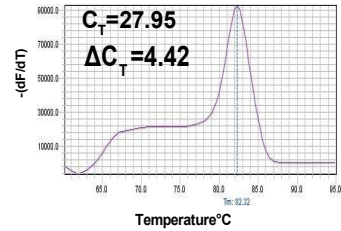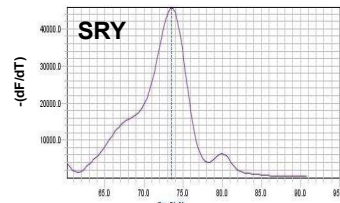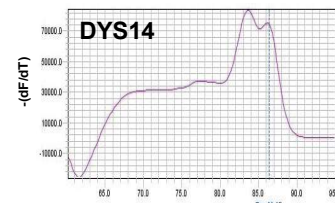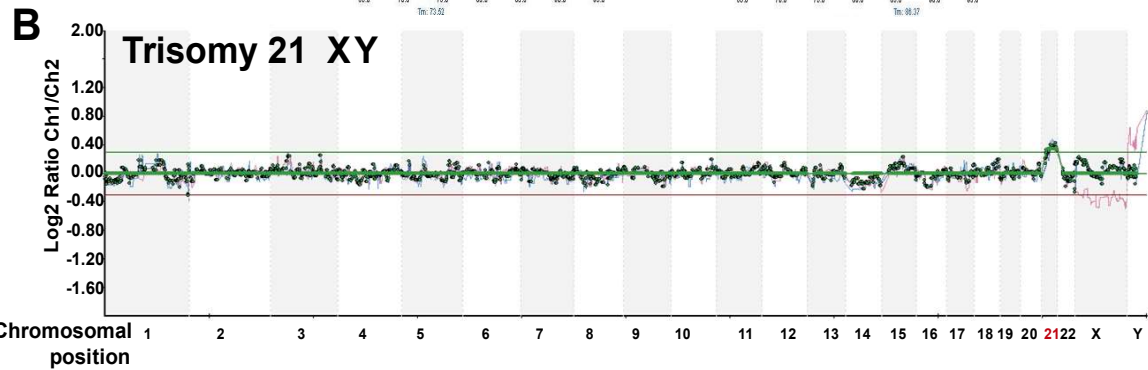

**HSD3B2 (reference)**

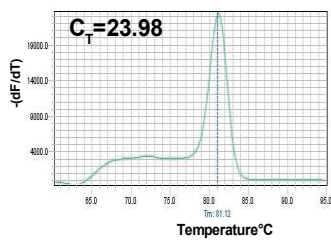

**RPL17 (chromosome 18)**

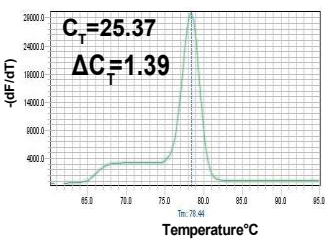

**TTC3 (Chromosome 21)**

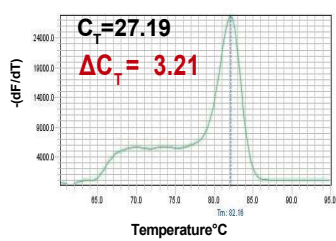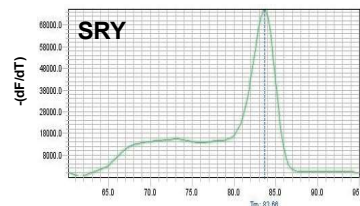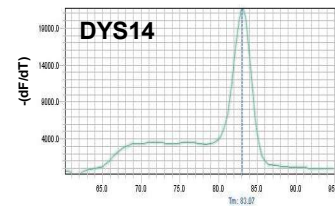

## **Supplementary figure**

**Detection of trisomies 18 and 21 using CGH analysis and qPCR-based genotyping in blastocyst stage.** CGH chromosome profiles and melting temperature peaks used for identification of (A) female (XX) embryo with trisomy 18 (B) male (XY) male embryo with trisomy 21. Delta  $C_T$  resulting from subtracting TTC3 and RPL17 from reference (HSD3B2) are exemplified.
